# Supplementary material
Source: PubMed Central journal article supplement (PMC3736566)
Supplement: NIHMS496027-supplement-FIG1.pdf [file NIHMS496027-supplement-FIG1.pdf]

**SDC Figure 1 (updated). Association between cumulative tenofovir exposure and risk of CKD in subgroups defined by baseline characteristics (excluding those with CKD at baseline)\***

| Characteristic                          | Events (n) | Participants (n) |  | Hazard Ratio (95% CI) | Interaction P Value |
|-----------------------------------------|------------|------------------|--|-----------------------|---------------------|
| Age <46 years                           | 163        | 5262             |  | 1.63 (1.40, 1.89)     | <b>0.043</b>        |
| Age ≥46 years                           | 370        | 4900             |  | 1.31 (1.14, 1.52)     |                     |
| Black                                   | 245        | 4998             |  | 1.26 (1.08, 1.47)     | 0.13                |
| Non-black                               | 288        | 5164             |  | 1.48 (1.29, 1.71)     |                     |
| No Proteinuria                          | 365        | 8261             |  | 1.45 (1.26, 1.66)     | 0.27                |
| Proteinuria                             | 168        | 1901             |  | 1.27 (1.05, 1.53)     |                     |
| No Smoking                              | 464        | 8267             |  | 1.41 (1.24, 1.60)     | 0.64                |
| Smoking                                 | 69         | 1895             |  | 1.30 (0.95, 1.77)     |                     |
| No CVD                                  | 460        | 9427             |  | 1.47 (1.30, 1.67)     | <b>0.016</b>        |
| CVD                                     | 73         | 735              |  | 0.85 (0.56, 1.31)     |                     |
| No Dyslipidemia                         | 428        | 8731             |  | 1.47 (1.29, 1.68)     | 0.071               |
| Dyslipidemia                            | 105        | 1431             |  | 1.15 (0.90, 1.45)     |                     |
| No Diabetes                             | 449        | 9475             |  | 1.47 (1.29, 1.68)     | <b>0.041</b>        |
| Diabetes                                | 84         | 687              |  | 1.03 (0.75, 1.41)     |                     |
| No Hypertension                         | 178        | 6417             |  | 1.63 (1.37, 1.93)     | <b>0.018</b>        |
| Hypertension                            | 355        | 3745             |  | 1.28 (1.15, 1.42)     |                     |
| No Drug Abuse                           | 391        | 6417             |  | 1.42 (1.24, 1.61)     | 0.50                |
| Drug Abuse                              | 142        | 3745             |  | 1.29 (1.02, 1.64)     |                     |
| Viral Load <100,000copies/mL            | 347        | 6823             |  | 1.43 (1.24-1.64)      | 0.37                |
| Viral Load >100,000copies/mL            | 186        | 3339             |  | 1.29 (1.09-1.53)      |                     |
| CD4 Count 0-199 cells/mm <sup>3</sup>   | 267        | 4473             |  | 1.33 (1.11-1.61)      | 0.28                |
| CD4 Count 200-350 cells/mm <sup>3</sup> | 115        | 2131             |  | 1.53 (1.16-2.01)      |                     |
| CD4 Count >350 cells/mm <sup>3</sup>    | 151        | 3558             |  | 1.36 (1.08-1.72)      |                     |
| BMI <25 kg/m <sup>2</sup>               | 285        | 5391             |  | 1.25 (1.05-1.50)      | 0.64                |
| BMI 25-30 kg/m <sup>2</sup>             | 174        | 3153             |  | 1.70 (1.38-2.11)      |                     |
| BMI >30 kg/m <sup>2</sup>               | 66         | 1215             |  | 1.39 (0.98-1.97)      |                     |

\*CV risk category based on Framingham risk score (<10% = low, 10-20% = moderate, >20% = high). All estimates based on multivariable adjusted Cox models described in Table 2. P value for test of interaction between cumulative tenofovir use and characteristic reported. Abbreviations: CI (confidence interval), eGFR (estimated glomerular filtration rate), CVD (cardiovascular disease), BMI (body mass index).
