# Supplementary material
Source: PubMed Central journal article supplement (PMC3736566)
Supplement: NIHMS496027-supplement-TAB1.pdf [file NIHMS496027-supplement-TAB1.pdf]

**SDC Table 1. Baseline clinical characteristics of HIV-infected persons, stratified by inclusion/exclusion status\***

|                                    | <b>Excluded from Study<br/>(n=8874)</b> | <b>Included in Study<br/>(n=10,841)</b> |
|------------------------------------|-----------------------------------------|-----------------------------------------|
| <b>Age, years</b>                  | 46 (40, 52)                             | 46 (40, 52)                             |
| <b>Race, %</b>                     |                                         |                                         |
| White                              | 39%                                     | 41%                                     |
| Black                              | 46%                                     | 49%                                     |
| Other                              | 15%                                     | 15%                                     |
| <b>Female, %</b>                   | 2.0%                                    | 2.3%                                    |
| <b>Comorbid Conditions, %</b>      |                                         |                                         |
| Hypertension                       | 33%                                     | 39%                                     |
| Diabetes                           | 6.0%                                    | 7.5%                                    |
| Dyslipidemia                       | 6.6%                                    | 15%                                     |
| Smoking                            | 11%                                     | 19%                                     |
| Hepatitis C Virus                  | 6.2%                                    | 16%                                     |
| <b>Measurements</b>                |                                         |                                         |
| CD4+ Count, cells/mm <sup>3</sup>  | 257 (42, 477)                           | 220 (51, 410)                           |
| HIV Viral Load (1000 copies/mL)    | 19 (1, 110)                             | 63 (16, 248)                            |
| Systolic blood pressure, mmHg      | 129 (116, 140)                          | 127 (114, 139)                          |
| Diastolic blood pressure, mmHg     | 78 (70, 85)                             | 77 (70, 84)                             |
| Body mass index, kg/m <sup>2</sup> | 25 (22, 28)                             | 24 (22, 27)                             |
| Total cholesterol, mg/dL           | 167 (138, 195)                          | 167 (140, 197)                          |
| Triglycerides, mg/dL               | 128 (96, 219)                           | 138 (95, 211)                           |
| Low density lipoprotein, mg/dL     | 107 (81, 134)                           | 98 (76, 124)                            |
| High density lipoprotein, mg/dL    | 36 (29, 46)                             | 37 (29, 47)                             |
| Glucose, mg/dL                     | 95 (86, 108)                            | 94 (86, 106)                            |
| Albumin, g/dL                      | 3.8 (3.3, 4.1)                          | 3.9 (3.5, 4.2)                          |
| eGFR, mL/min/1.73m <sup>2</sup>    | 91 (74, 111)                            | 97 (82, 114)                            |
| eGFR <60mL/min/1.73m <sup>2</sup>  | 1.2%                                    | 5.4%                                    |
| Proteinuria                        | 38%                                     | 33%                                     |

\*Continuous variables reported as median (IQR). Proteinuria defined by urinalysis protein 30 mg/dL or greater.
