# Supplementary material
Source: PubMed Central journal article supplement (PMC3736566)
Supplement: NIHMS496027-supplement-TAB2.pdf [file NIHMS496027-supplement-TAB2.pdf]

**SDC Table 2. Summary of events and person-years by exposure to tenofovir**

| <b>Outcome</b>                | <b>Events</b> | <b>Person-Years</b> | <b>Rate (per 1,000 Person-Years)</b> |
|-------------------------------|---------------|---------------------|--------------------------------------|
| <b>Proteinuria</b>            |               |                     |                                      |
| Tenofovir never users         | 2,646         | 32,421              | 81.6                                 |
| Tenofovir ever users          | 754           | 5,711               | 132.0                                |
| <b>Rapid Decline</b>          |               |                     |                                      |
| Tenofovir never users         | 2,349         | 43,693              | 53.8                                 |
| Tenofovir ever users          | 729           | 7,896               | 92.3                                 |
| <b>Chronic Kidney Disease</b> |               |                     |                                      |
| Tenofovir never users         | 352           | 46,724              | 7.5                                  |
| Tenofovir ever users          | 181           | 9,692               | 18.7                                 |
