# Supplementary material
Source: PubMed Central journal article supplement (PMC3736566)
Supplement: NIHMS496027-supplement-TAB4.pdf [file NIHMS496027-supplement-TAB4.pdf]

**SDC Table 4. Association of current and past tenofovir use with risk of kidney disease outcomes.**

| Outcome       | Current vs. Never        |         | Past (≤6 months)<br>vs. Never |         | Past (>6 months)<br>vs. Never |         |
|---------------|--------------------------|---------|-------------------------------|---------|-------------------------------|---------|
|               | Hazard Ratio<br>(95% CI) | P Value | Hazard Ratio<br>(95% CI)      | P Value | Hazard Ratio<br>(95% CI)      | P Value |
| Proteinuria   | 1.80 (1.60-2.02)         | <.0001  | 1.63 (1.37-1.93)              | <.0001  | 1.42 (1.19-1.70)              | 0.0001  |
| Rapid decline | 1.45 (1.29-1.64)         | <.0001  | 1.43 (1.20-1.69)              | <.0001  | 1.15 (0.97-1.36)              | 0.10    |
| CKD           | 1.70 (1.33-2.18)         | <.0001  | 1.87 (1.33-2.63)              | 0.0003  | 1.81 (1.31-2.52)              | 0.0004  |

All estimates based on multivariable adjusted time-dependent Cox models described in Table 2.
