# Supplementary material
Source: PubMed Central journal article supplement (PMC3736566)
Supplement: NIHMS496027-supplement-TAB5.pdf [file NIHMS496027-supplement-TAB5.pdf]

**SDC Table 5. Association of era\* of antiretroviral use and cumulative tenofovir with risk of kidney disease outcomes**

| <b>Outcome</b>                | <b>Tenofovir x Era Interaction</b> | <b>Era</b> | <b>Tenofovir Effect (per year of use)</b> | <b>P Value</b> | <b>Overall Tenofovir Effect (From Table 2)</b> |
|-------------------------------|------------------------------------|------------|-------------------------------------------|----------------|------------------------------------------------|
| <b>Proteinuria</b>            |                                    |            |                                           |                |                                                |
| Era x Tenofovir               | p = 0.014                          | Early      | 2.15 (1.26, 3.68)                         | 0.0051         | 1.34 (1.25-1.45)                               |
|                               |                                    | Mid        | 1.48 (1.28, 1.71)                         | <.0001         |                                                |
|                               |                                    | Late       | 1.23 (1.16, 1.31)                         | <.0001         |                                                |
| <b>Rapid Decline</b>          |                                    |            |                                           |                |                                                |
| Era x Tenofovir               | p = 0.0018                         | Early      | 1.69 (0.96, 3.00)                         | 0.071          | 1.11 (1.03-1.18)                               |
|                               |                                    | Mid        | 1.34 (1.18, 1.53)                         | <.0001         |                                                |
|                               |                                    | Late       | 1.04 (0.98, 1.12)                         | 0.20           |                                                |
| <b>Chronic Kidney Disease</b> |                                    |            |                                           |                |                                                |
| Era x Tenofovir               | p = 0.12                           | Early      | 3.34 (1.23-9.04)                          | 0.018          | 1.33 (1.18-1.51)                               |
|                               |                                    | Mid        | 1.60 (1.25-2.05)                          | 0.0002         |                                                |
|                               |                                    | Late       | 1.35 (1.21-1.50)                          | <.0001         |                                                |

\*Early = <2003, mid = 2003-04, late = 2005-07. All estimates based on multivariable adjusted time-dependent Cox models described in Table 2.
